# Supplementary material for: Breaking scaling relations in nitric oxide reduction by surface functionalization of MXenes
Source: Royal Society of Chemistry journal article supplement (doi:10.1039/d2ta06354a), 2022-01-01
Supplement: d2ta06354a1.pdf [file d2ta06354a1.pdf]

## Supporting Information

### **Breaking scaling relations in nitric oxide reduction by surface functionalization on MXenes**

Shihui Zhao<sup>1</sup>, Ying Li<sup>1</sup>, Zhonglu Guo<sup>1,\*</sup>, Chengchun Tang<sup>1</sup>, Baisheng Sa<sup>2</sup>, Naihua Miao<sup>3</sup>, Jian Zhou<sup>3</sup>, Zhimei Sun<sup>3,\*</sup>

*<sup>1</sup>Hebei Key Laboratory of Boron Nitride Micro and Nano Materials, School of Materials Science and Engineering, Hebei University of Technology, Tianjin 300130, China*

*<sup>2</sup>Key Laboratory of Eco-materials Advanced Technology, College of Materials Science and Engineering, Fuzhou University, Fuzhou 350108, Fujian, China*

*<sup>3</sup>School of Materials Science and Engineering, Beihang University, Beijing 100191, China*

\*Correspondence and requests for materials should be addressed to Z. L. Guo or Z. M. Sun: [zlguo@hebut.edu.cn](mailto:zlguo@hebut.edu.cn), [zmsun@buaa.edu.cn](mailto:zmsun@buaa.edu.cn)

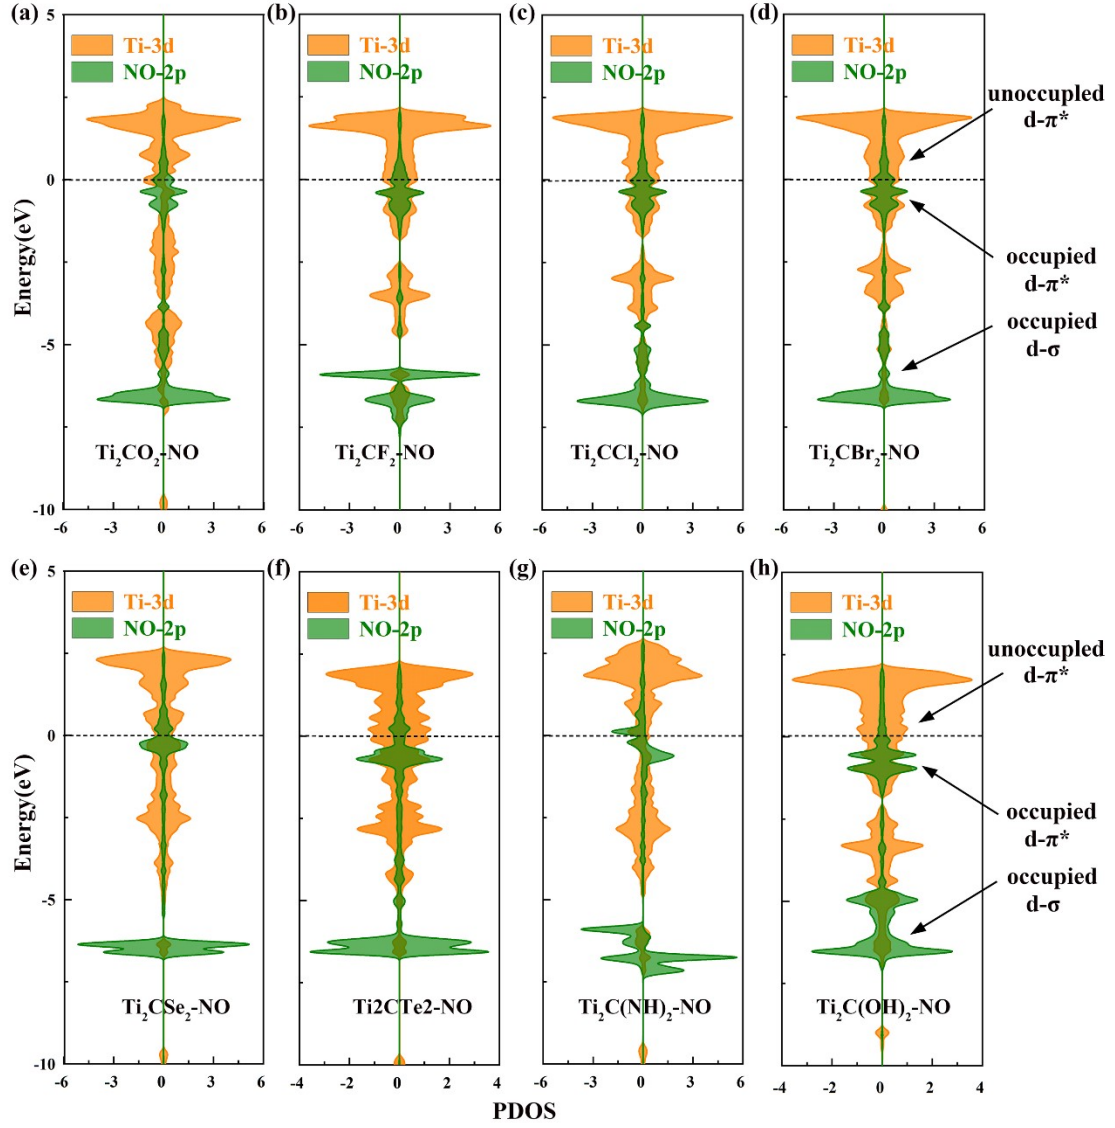

**Fig. S1** Partial density of states (PDOS) of the interaction between Ti-3d and NO-2p orbitals on NO absorbed functionalized  $\text{Ti}_2\text{CT}_2$  MXenes ( $T=\text{O, F, Cl, Br, Se, Te, NH, OH}$ ). The Fermi level is set to be 0 eV.

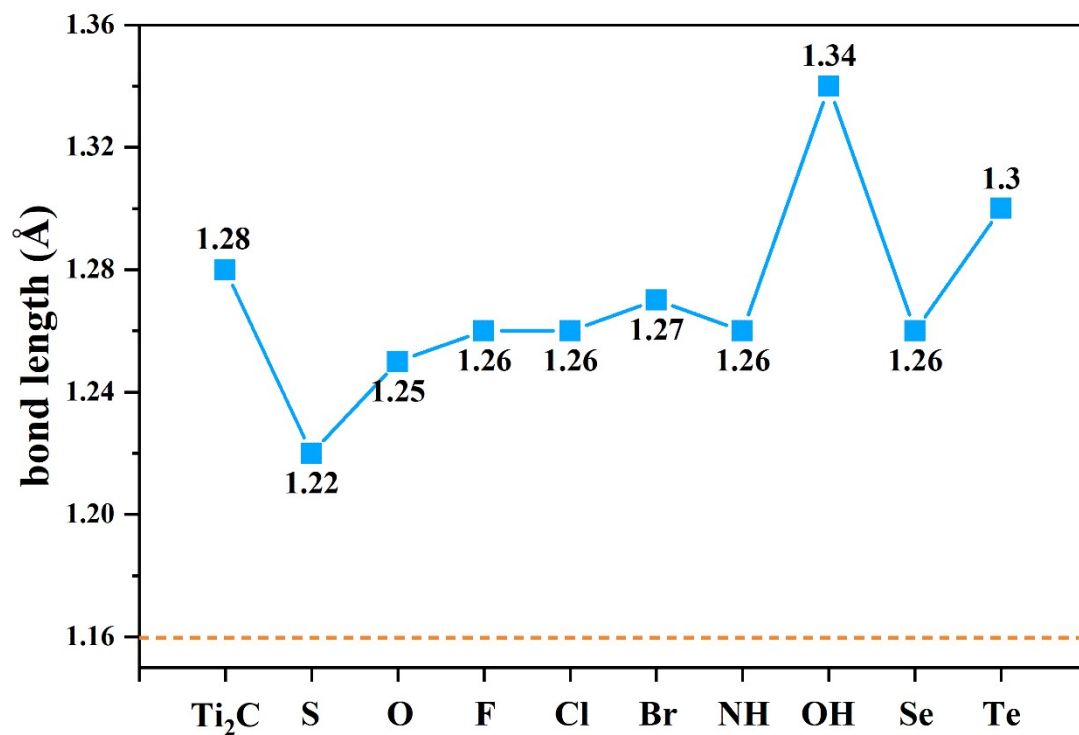

**Fig. S2** N-O bond length (Å) for NO adsorbed on bare Ti<sub>2</sub>C MXene and functionalized Ti<sub>2</sub>CT<sub>2</sub> MXenes. The orange dashed line represents N-O bond length of free NO gas molecule.

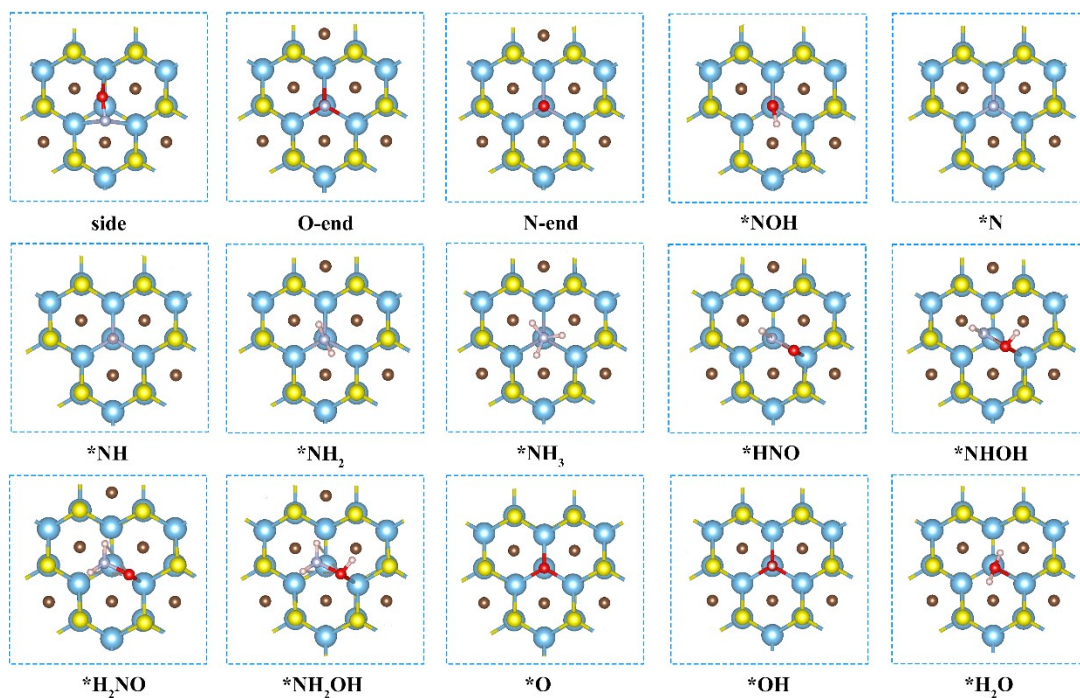

**Fig. S3** The optimized configurations of all NORR intermediates on Ti<sub>2</sub>CS<sub>2</sub> MXenes.

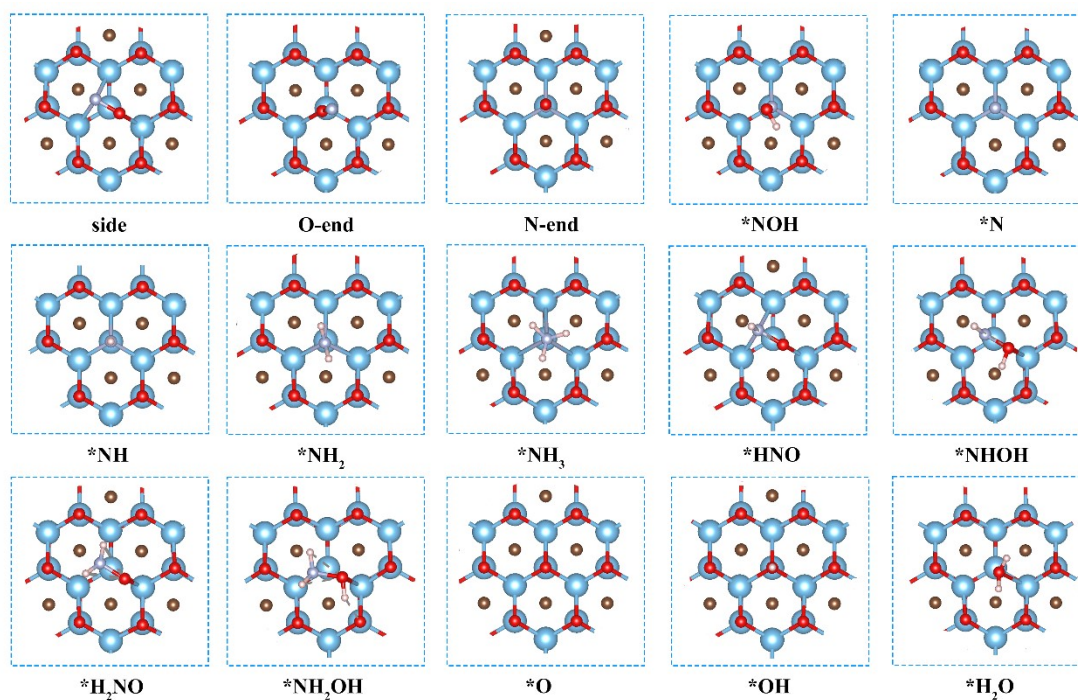

**Fig. S4** The optimized configurations of all NORR intermediates on  $\text{Ti}_2\text{CO}_2$  MXenes.

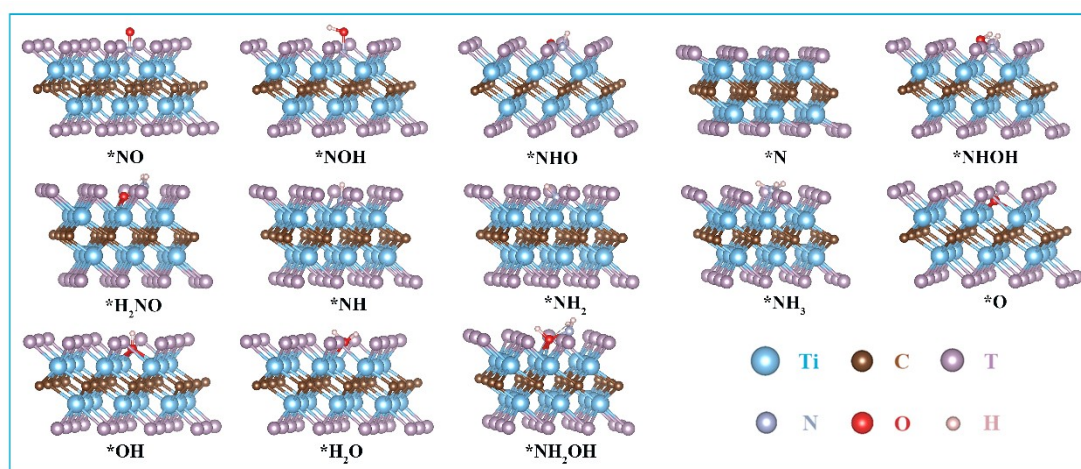

**Fig. S5** The optimized configurations of all NORR intermediates on functionalized  $\text{Ti}_2\text{CT}_2$  MXenes.

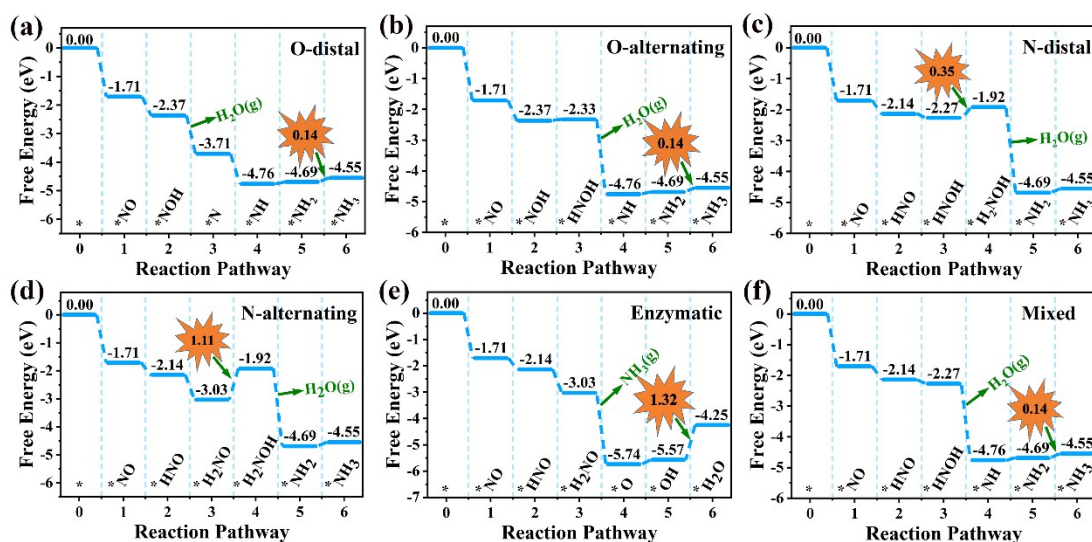

**Fig. S6** NORR free energy diagrams of the considered pathways on  $\text{Ti}_2\text{CO}_2$  MXene. The applied potential is zero.

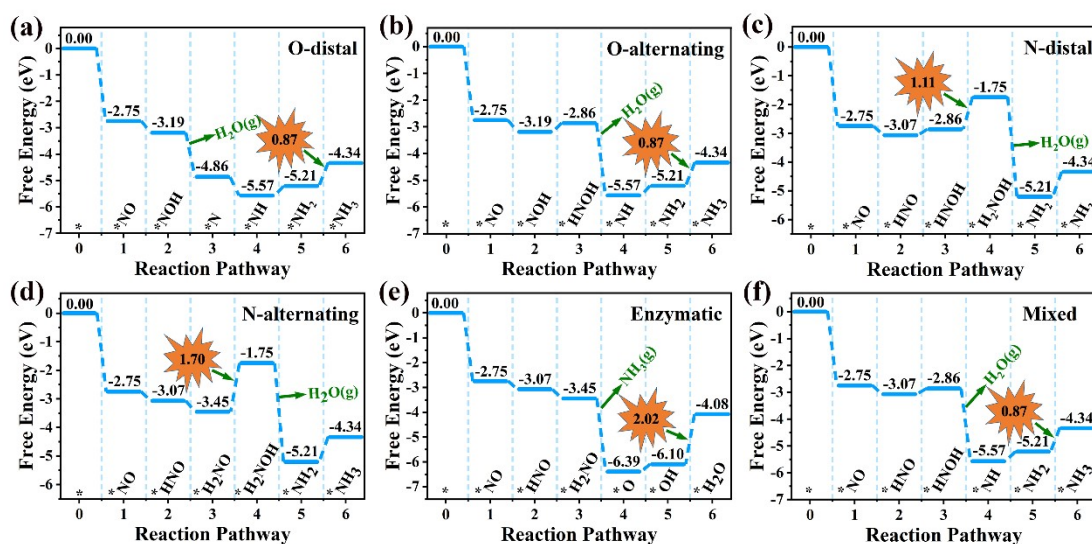

**Fig. S7** NORR free energy diagrams of the considered pathways on  $\text{Ti}_2\text{CF}_2$  MXene. The applied potential is zero.

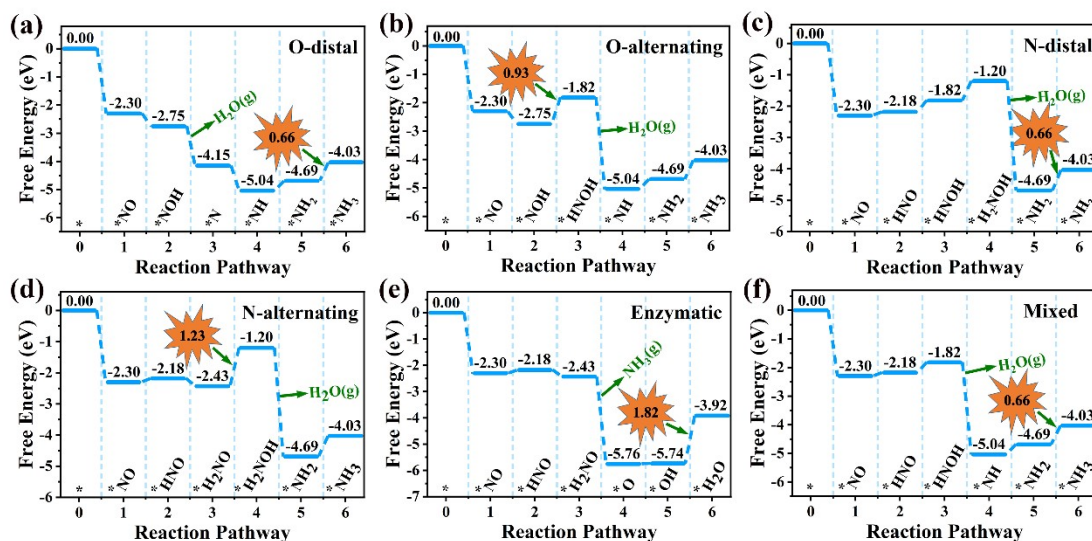

**Fig. S8** NORR free energy diagrams of the considered pathways on  $\text{Ti}_2\text{CCl}_2$  MXene. The applied potential is zero.

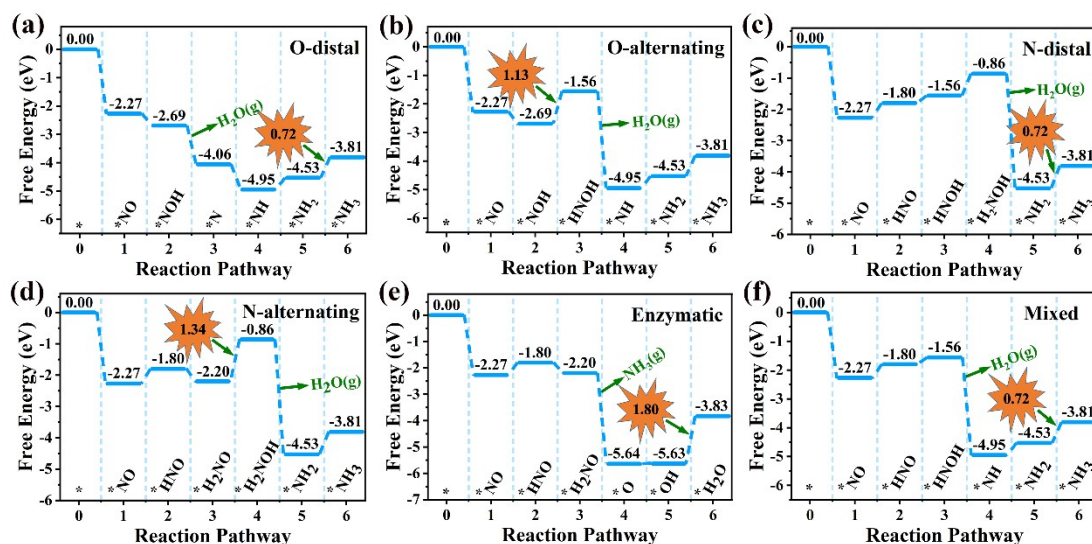

**Fig. S9** NORR free energy diagrams of the considered pathways on  $\text{Ti}_2\text{CBr}_2$  MXene. The applied potential is zero.

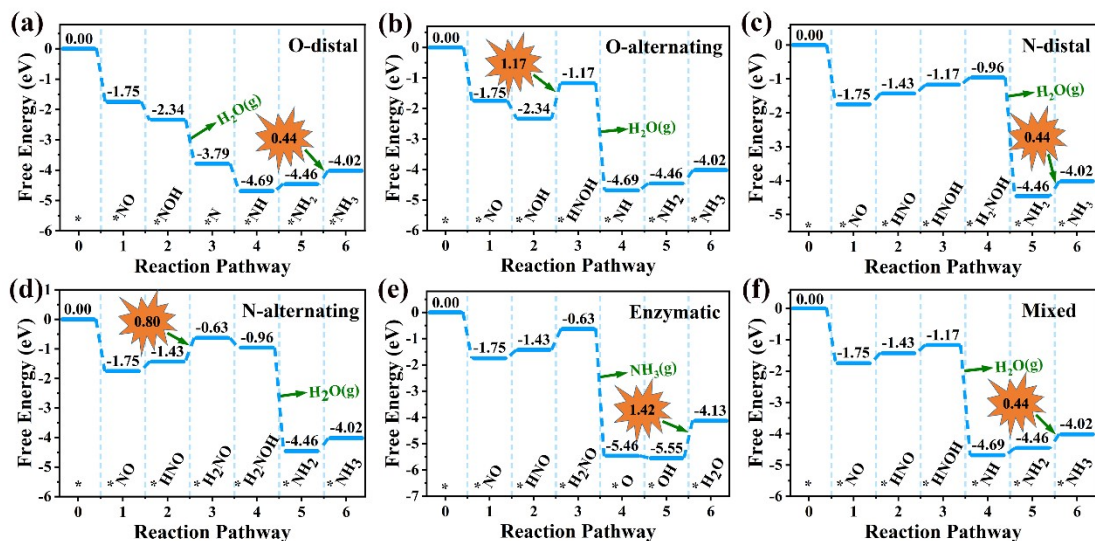

**Fig. S10** NORR free energy diagrams of the considered pathways on  $\text{Ti}_2\text{CSe}_2$  MXene. The applied potential is zero.

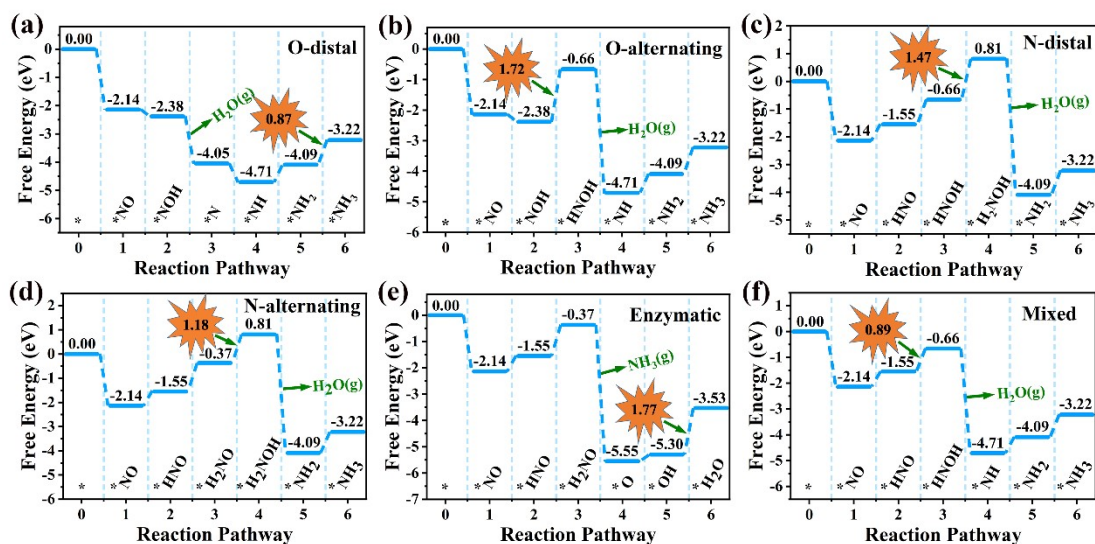

**Fig. S11** NORR free energy diagrams of the considered pathways on  $\text{Ti}_2\text{CTe}_2$  MXene. The applied potential is zero

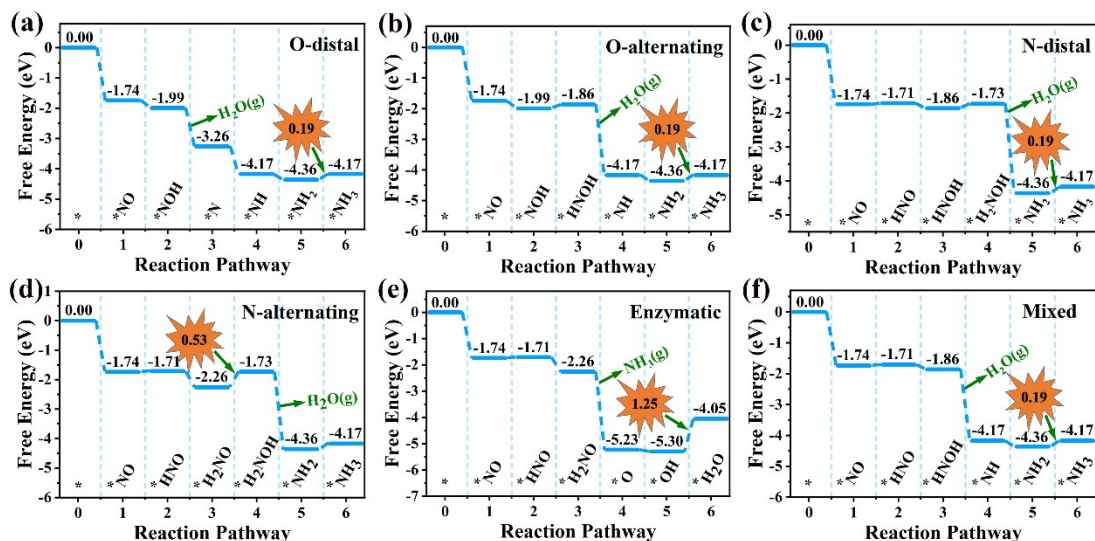

**Fig. S12** NORR free energy diagrams of the considered pathways on  $\text{Ti}_2\text{C}(\text{NH})_2$  MXene. The applied potential is zero.

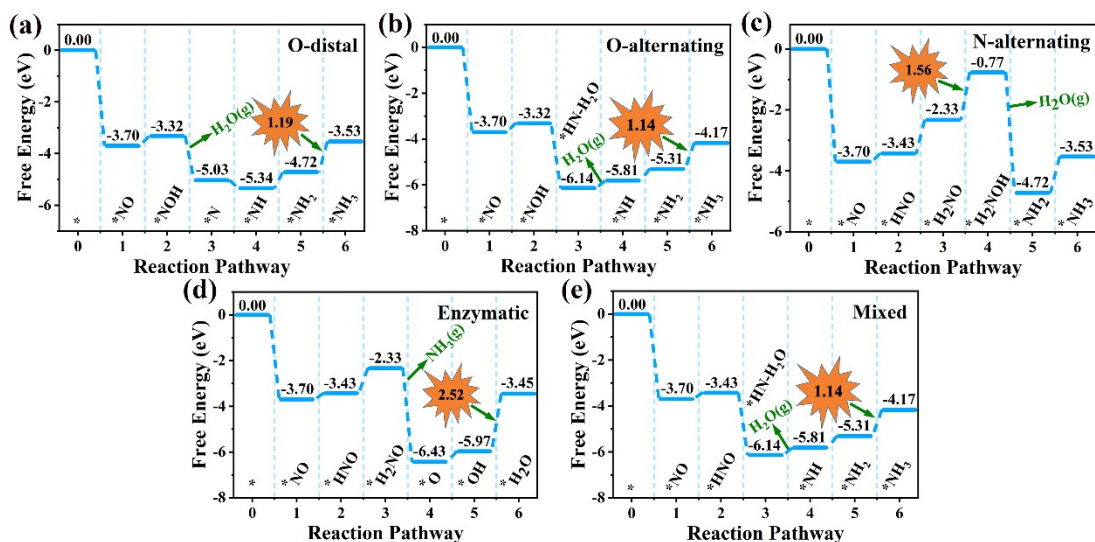

**Fig. S13** NORR free energy diagrams of the considered pathways on  $\text{Ti}_2\text{C}(\text{OH})_2$  MXene. The applied potential is zero.

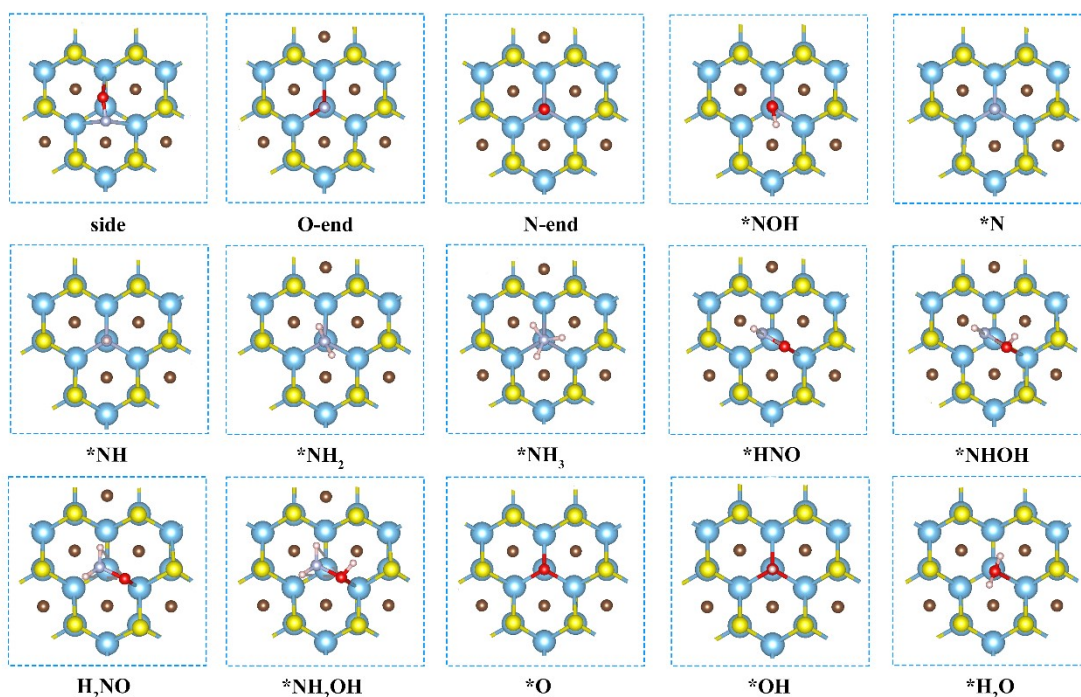

**Fig. S14** The optimized configurations of all NORR intermediates on  $\text{Ti}_2\text{CS}_2$  MXene with solvent effect.

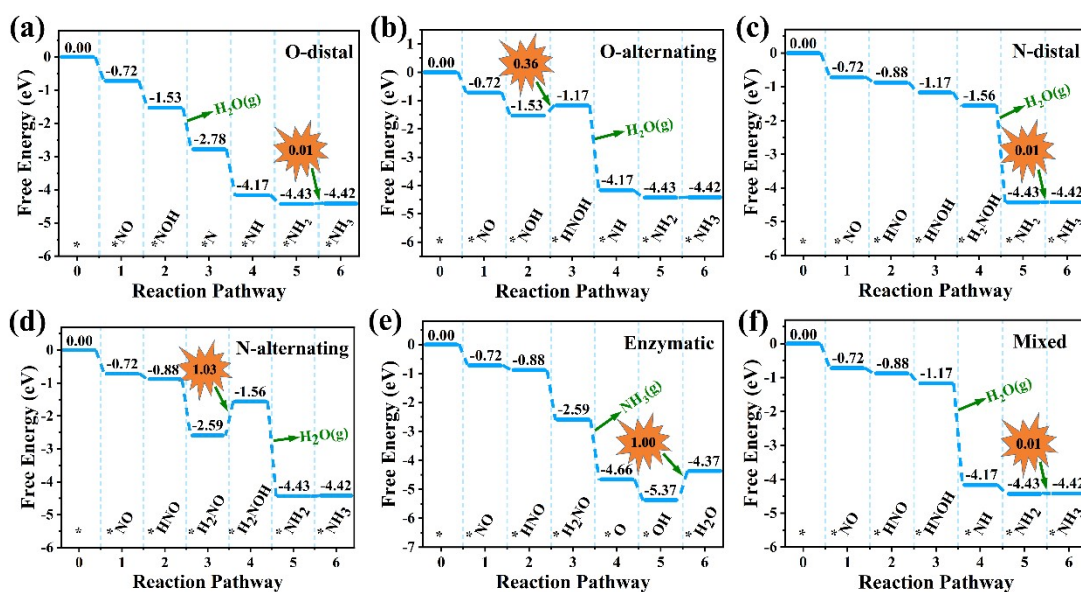

**Fig. S15** NORR free energy diagrams of the considered pathways on  $\text{Ti}_2\text{CS}_2$  MXene with solvent effect. The applied potential is zero.

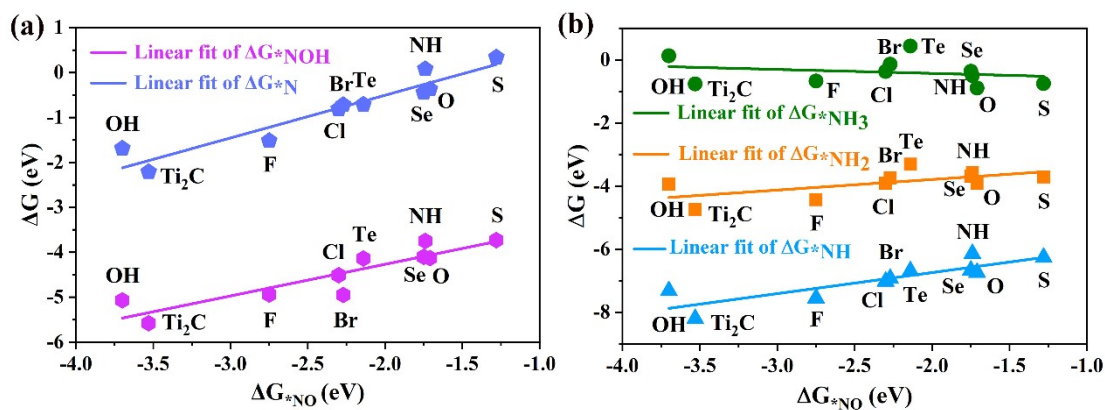

**Fig. S16** Linear scaling relations between the adsorption energies of involved intermediates of the most favorable pathway and the adsorption energy of NO ( $\Delta G_{*NO}$ ).

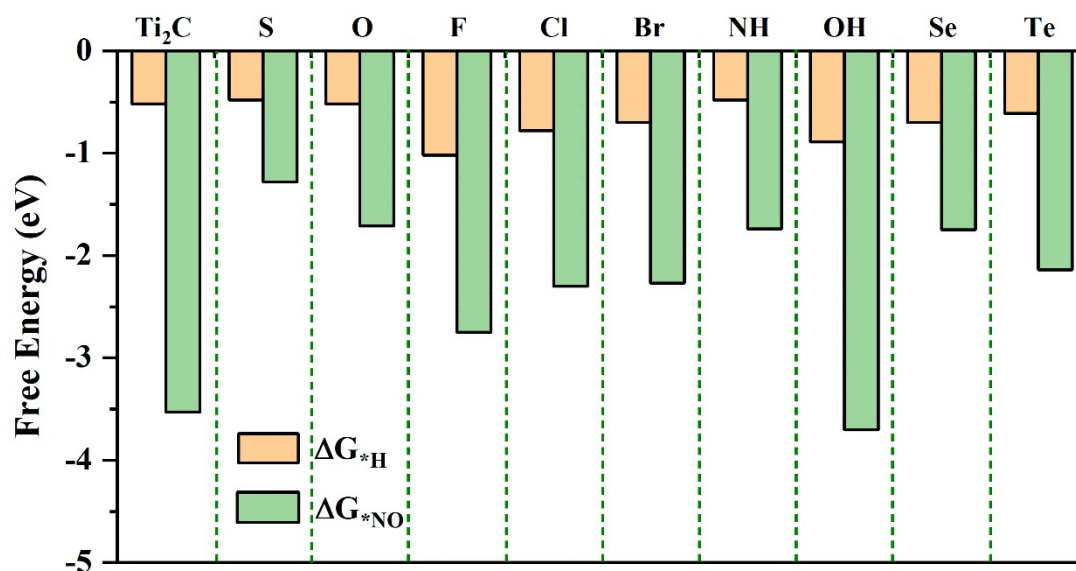

**Fig. S17** Adsorption energies of  $*NO$  ( $\Delta G_{*NO}$ ) and  $*H$  ( $\Delta G_{*H}$ ) on bare  $Ti_2C$  and functionalized  $Ti_2CT_2$  MXenes.

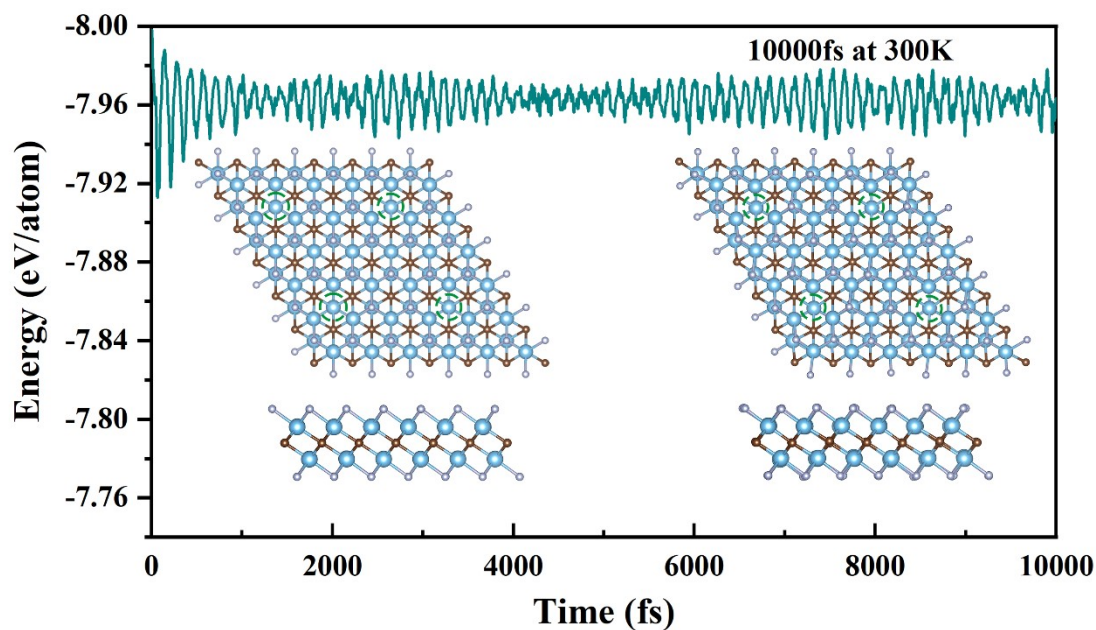

**Fig. S18** AIMD simulation of  $\text{Ti}_2\text{CF}_2$  MXene with F vacancies. The inserts illustrate the initial and final (10000 fs) atomic structures shown in the top and side view. The green dotted circles represent the F vacancies.

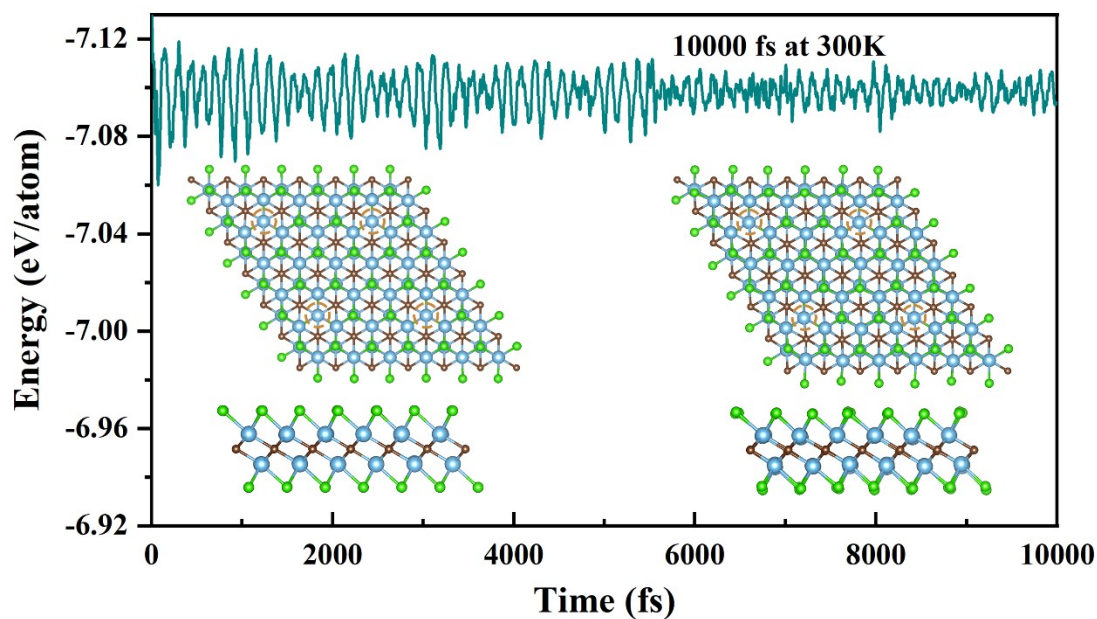

**Fig. S19** AIMD simulation of  $\text{Ti}_2\text{CCl}_2$  MXene with Cl vacancies. The inserts illustrate the initial and final (10000 fs) atomic structures shown in the top and side view. The orange dotted circles represent the Cl vacancies.

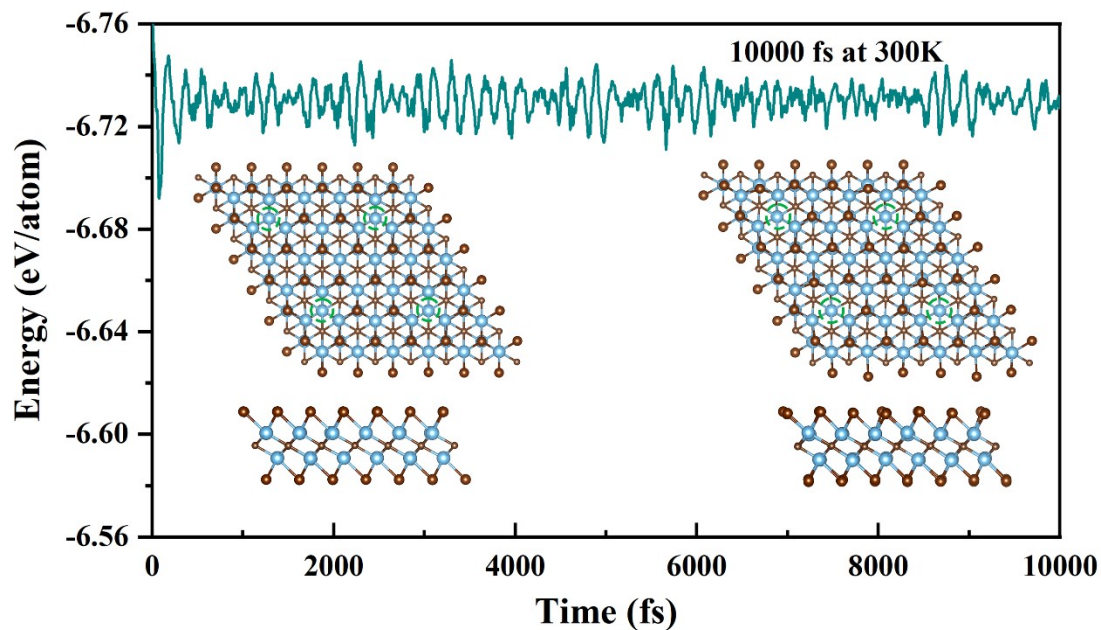

**Fig. S20** AIMD simulation of  $\text{Ti}_2\text{CBr}_2$  MXene with Br vacancies. The inserts illustrate the initial and final (10000 fs) atomic structures shown in the top and side view. The green dotted circles represent the Br vacancies.

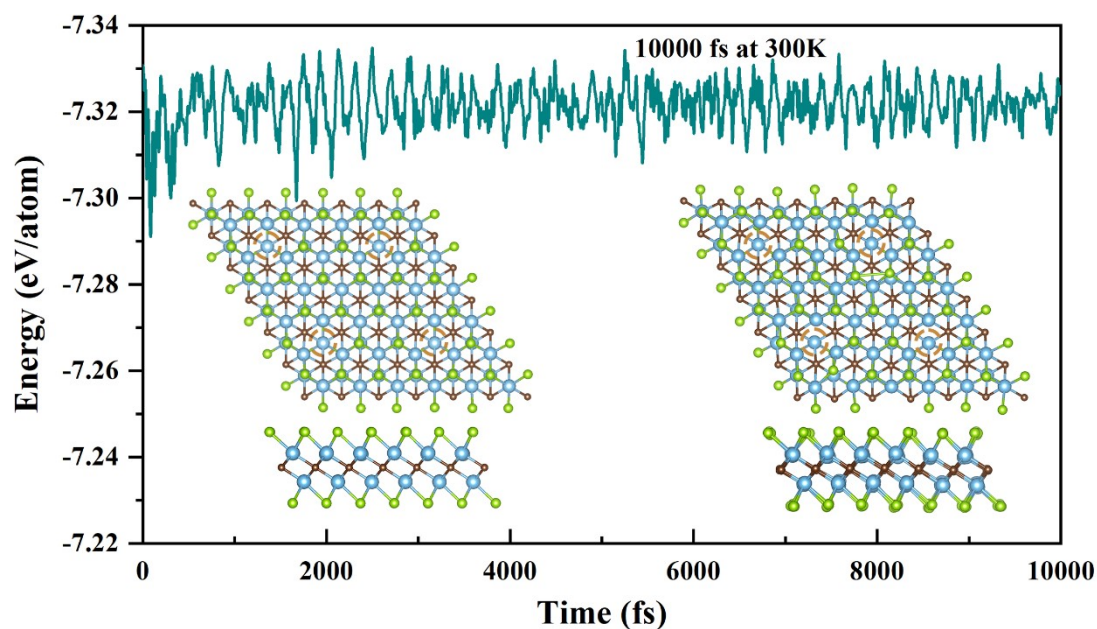

**Fig. S21** AIMD simulation of  $\text{Ti}_2\text{CSe}_2$  MXene with Se vacancies. The inserts illustrate the initial and final (10000 fs) atomic structures shown in the top and side view. The orange dotted circles represent the Se vacancies.

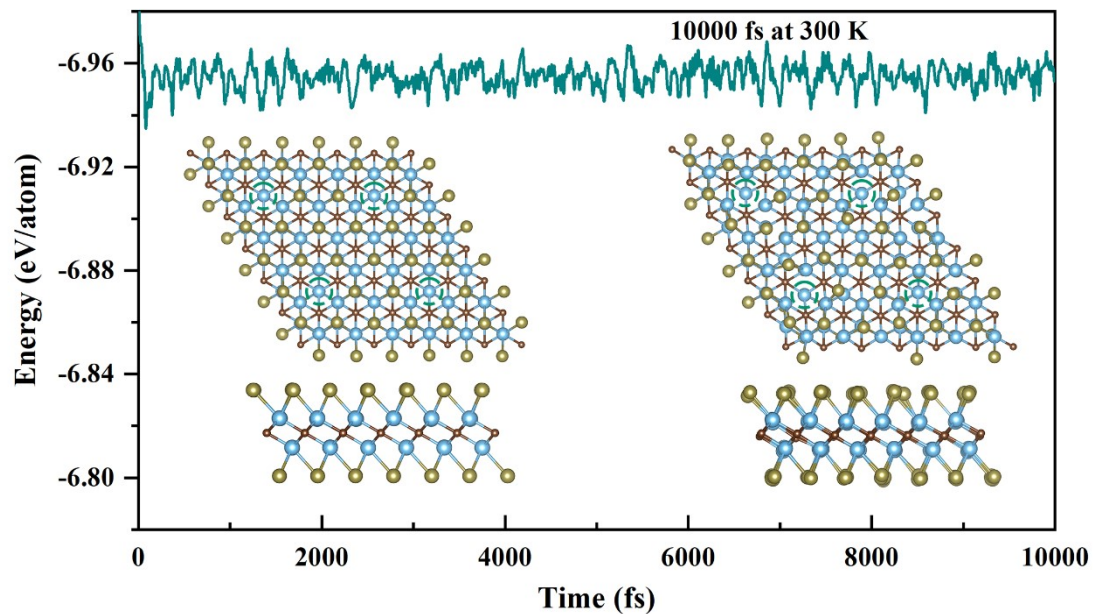

**Fig. S22** AIMD simulation of  $\text{Ti}_2\text{CTe}_2$  MXene with Te vacancies. The inserts illustrate the initial and final (10000 fs) atomic structures shown in the top and side view. The green dotted circles represent the Te vacancies.

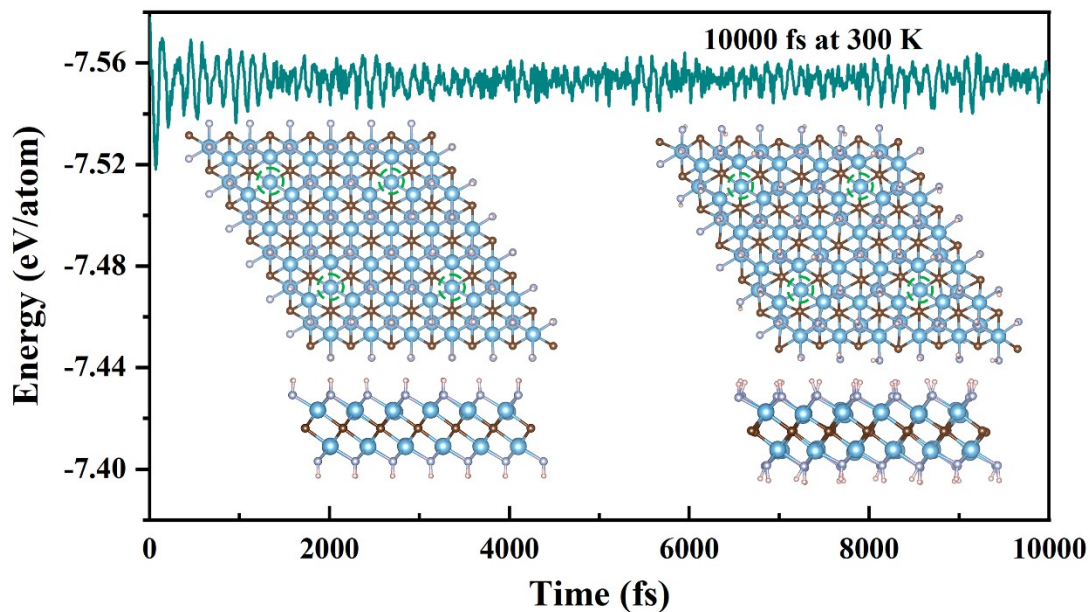

**Fig. S23** AIMD simulation of  $\text{Ti}_2\text{C}(\text{NH})_2$  MXene with NH vacancies. The inserts illustrate the initial and final (10000 fs) atomic structures shown in the top and side view. The green dotted circles represent the NH vacancies.

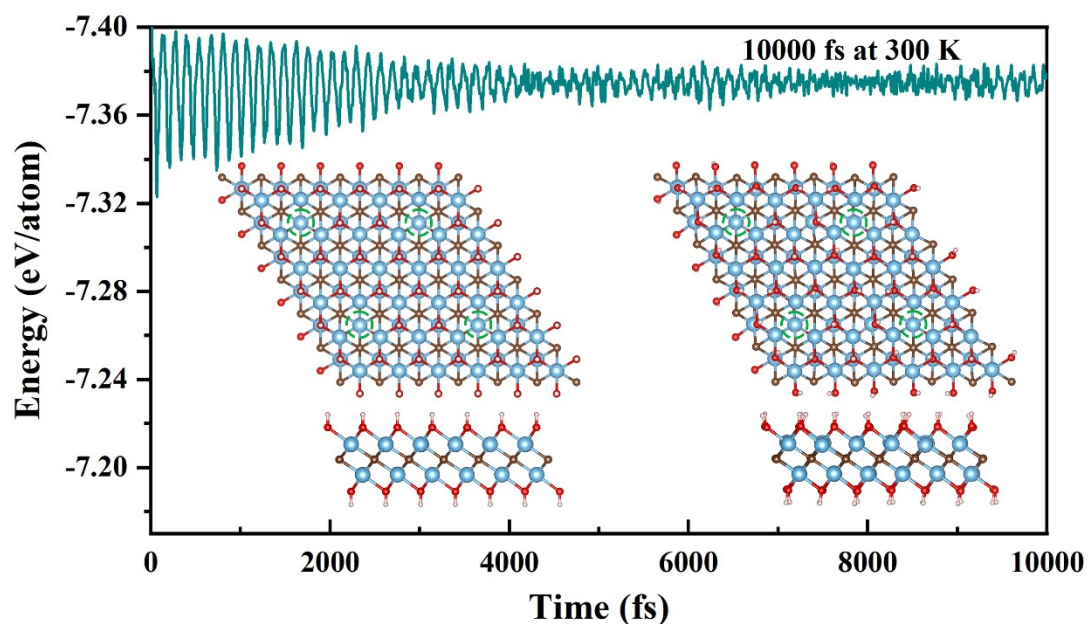

**Fig. S24** AIMD simulation of  $\text{Ti}_2\text{C}(\text{OH})_2$  MXene with OH vacancies. The inserts illustrate the initial and final (10000 fs) atomic structures shown in the top and side view. The green dotted circles represent the OH vacancies.

**Table S1.** Comparison of adsorption energy of Mode 1 and Mode 2 for functionalized  $\text{Ti}_2\text{CT}_2$  MXenes unit cells (units in eV). “/” represents structural instability.

| MXenes                             | Model 1 | Model 2 |
|------------------------------------|---------|---------|
| $\text{Ti}_2\text{CS}_2$           | -38.10  | -39.17  |
| $\text{Ti}_2\text{CO}_2$           | -43.76  | -45.57  |
| $\text{Ti}_2\text{CF}_2$           | -39.55  | -40.08  |
| $\text{Ti}_2\text{CCl}_2$          | -35.81  | -36.29  |
| $\text{Ti}_2\text{CBr}_2$          | -34.21  | -34.60  |
| $\text{Ti}_2\text{CSe}_2$          | -36.65  | -37.47  |
| $\text{Ti}_2\text{CTe}_2$          | -35.06  | -35.52  |
| $\text{Ti}_2\text{C}(\text{NH})_2$ | /       | -54.15  |
| $\text{Ti}_2\text{C}(\text{OH})_2$ | /       | -52.15  |

**Table S2.** Comparison of the free energy change of  $\Delta G$  (\*NO - \*NOH) and  $\Delta G$  (\*NO - \*HNO) on functionalized  $\text{Ti}_2\text{CT}_2$  MXenes ( $\Delta G$ , units in eV)

| MXenes                             | $\Delta G(*\text{NO} - *\text{NOH})$ | $\Delta G(*\text{NO} - *\text{HNO})$ |
|------------------------------------|--------------------------------------|--------------------------------------|
| $\text{Ti}_2\text{CS}_2$           | -0.69                                | -0.05                                |
| $\text{Ti}_2\text{CO}_2$           | -0.66                                | -0.43                                |
| $\text{Ti}_2\text{CF}_2$           | -0.44                                | -0.32                                |
| $\text{Ti}_2\text{CCl}_2$          | -0.45                                | 0.12                                 |
| $\text{Ti}_2\text{CBr}_2$          | -0.42                                | 0.47                                 |
| $\text{Ti}_2\text{CSe}_2$          | -0.59                                | 0.32                                 |
| $\text{Ti}_2\text{CTe}_2$          | -0.24                                | 0.59                                 |
| $\text{Ti}_2\text{C}(\text{NH})_2$ | -0.25                                | 0.03                                 |
| $\text{Ti}_2\text{C}(\text{OH})_2$ | 0.38                                 | 0.27                                 |

**Table S3.** Comparison of the adsorption energy of  $\Delta G_{*\text{NOH}}$  and  $\Delta G_{*\text{NHO}}$  on functionalized  $\text{Ti}_2\text{CT}_2$  MXenes ( $\Delta G$ , units in eV)

| MXenes                    | $\Delta G_{*\text{NOH}}$ | $\Delta G_{*\text{NHO}}$ |
|---------------------------|--------------------------|--------------------------|
| $\text{Ti}_2\text{CS}_2$  | -3.73                    | -1.30                    |
| $\text{Ti}_2\text{CO}_2$  | -4.13                    | -2.11                    |
| $\text{Ti}_2\text{CF}_2$  | -4.94                    | -3.03                    |
| $\text{Ti}_2\text{CCl}_2$ | -4.51                    | -2.15                    |
| $\text{Ti}_2\text{CBr}_2$ | -4.45                    | -1.77                    |
| $\text{Ti}_2\text{CSe}_2$ | -4.10                    | -1.40                    |

|                                    |       |       |
|------------------------------------|-------|-------|
| $\text{Ti}_2\text{CTe}_2$          | -4.14 | -1.52 |
| $\text{Ti}_2\text{C}(\text{NH})_2$ | -3.75 | -1.68 |
| $\text{Ti}_2\text{C}(\text{OH})_2$ | -5.07 | -3.40 |

**Table S4.** Computed Gibbs free energy of each elementary step on the  $\text{Ti}_2\text{CS}_2$  MXene without and with solvation effects. ( $\Delta G$ , units in eV)

| $\text{Ti}_2\text{CS}_2$                                                       | $\Delta G$ (without solvation effects) | $\Delta G$ (with solvation effects) |
|--------------------------------------------------------------------------------|----------------------------------------|-------------------------------------|
| $*+\text{NO} \rightarrow *\text{NO}$                                           | -1.28                                  | -0.72                               |
| $*\text{NO}+\text{H}^++\text{e}^- \rightarrow *\text{NOH}$                     | -0.69                                  | -0.81                               |
| $*\text{NO}+\text{H}^++\text{e}^- \rightarrow *\text{HNO}$                     | -0.05                                  | -0.16                               |
| $*\text{NOH}+\text{H}^++\text{e}^- \rightarrow *\text{N}+\text{H}_2\text{O}$   | -1.02                                  | -1.25                               |
| $*\text{N}+\text{H}^++\text{e}^- \rightarrow *\text{NH}$                       | -1.29                                  | -1.39                               |
| $*\text{NH}+\text{H}^++\text{e}^- \rightarrow *\text{NH}_2$                    | -0.21                                  | -0.26                               |
| $*\text{NH}_2+\text{H}^++\text{e}^- \rightarrow *\text{NH}_3$                  | 0.08                                   | 0.01                                |
| $*\text{NOH}+\text{H}^++\text{e}^- \rightarrow *\text{NHOH}$                   | 0.49                                   | 0.36                                |
| $*\text{HNO}+\text{H}^++\text{e}^- \rightarrow *\text{NHOH}$                   | -0.15                                  | -0.29                               |
| $*\text{HNO}+\text{H}^++\text{e}^- \rightarrow *\text{H}_2\text{NO}$           | -1.62                                  | -1.71                               |
| $*\text{NHOH}+\text{H}^++\text{e}^- \rightarrow *\text{NH}_2\text{OH}$         | -0.07                                  | -0.39                               |
| $*\text{H}_2\text{NO}+\text{H}^++\text{e}^- \rightarrow *\text{NH}_2\text{OH}$ | 1.40                                   | 1.03                                |
| $*\text{O}+\text{H}^++\text{e}^- \rightarrow *\text{OH}$                       | -0.50                                  | -0.71                               |
| $*\text{OH}+\text{H}^++\text{e}^- \rightarrow *\text{H}_2\text{O}$             | 1.17                                   | 1.00                                |

**Table S5.** Computed Gibbs free energy of the optimal pathway for ammonia formation on the Ti<sub>2</sub>CO<sub>2</sub> MXene without and with solvation effects. ( $\Delta G$ , units in eV)

| Ti <sub>2</sub> CO <sub>2</sub>                                                  | $\Delta G$ (without solvation effects) | $\Delta G$ (with solvation effects) |
|----------------------------------------------------------------------------------|----------------------------------------|-------------------------------------|
| *+NO $\rightarrow$ *NO                                                           | -1.71                                  | -1.00                               |
| *NO+H <sup>+</sup> +e <sup>-</sup> $\rightarrow$ *NOH                            | -0.67                                  | -0.84                               |
| *NOH+H <sup>+</sup> +e <sup>-</sup> $\rightarrow$ *N+H <sub>2</sub> O            | -1.34                                  | -1.49                               |
| *N+ H <sup>+</sup> +e <sup>-</sup> $\rightarrow$ *NH                             | -1.05                                  | -1.16                               |
| *NH+ H <sup>+</sup> +e <sup>-</sup> $\rightarrow$ *NH <sub>2</sub>               | 0.06                                   | -0.01                               |
| *NH <sub>2</sub> + H <sup>+</sup> +e <sup>-</sup> $\rightarrow$ *NH <sub>3</sub> | <b>0.14</b>                            | -0.10                               |

**Table S6.** Computed Gibbs free energy of the optimal pathway for ammonia formation on the Ti<sub>2</sub>CF<sub>2</sub> MXene without and with solvation effects. ( $\Delta G$ , units in eV)

| Ti <sub>2</sub> CF <sub>2</sub>                                                  | $\Delta G$ (without solvation effects) | $\Delta G$ (with solvation effects) |
|----------------------------------------------------------------------------------|----------------------------------------|-------------------------------------|
| *+NO $\rightarrow$ *NO                                                           | -2.75                                  | -2.19                               |
| *NO+H <sup>+</sup> +e <sup>-</sup> $\rightarrow$ *NOH                            | -0.44                                  | -0.49                               |
| *NOH+H <sup>+</sup> +e <sup>-</sup> $\rightarrow$ *N+H <sub>2</sub> O            | -1.67                                  | -1.88                               |
| *N+ H <sup>+</sup> +e <sup>-</sup> $\rightarrow$ *NH                             | -0.71                                  | -0.73                               |
| *NH+ H <sup>+</sup> +e <sup>-</sup> $\rightarrow$ *NH <sub>2</sub>               | 0.36                                   | 0.26                                |
| *NH <sub>2</sub> + H <sup>+</sup> +e <sup>-</sup> $\rightarrow$ *NH <sub>3</sub> | <b>0.87</b>                            | <b>0.60</b>                         |

**Table S7.** Computed Gibbs free energy of the optimal pathway for ammonia formation on the Ti<sub>2</sub>CCl<sub>2</sub> MXene without and with solvation effects. ( $\Delta G$ , units in eV)

| Ti <sub>2</sub> CCl <sub>2</sub>                                                 | $\Delta G$ (without solvation effects) | $\Delta G$ (with solvation effects) |
|----------------------------------------------------------------------------------|----------------------------------------|-------------------------------------|
| *+NO $\rightarrow$ *NO                                                           | -2.30                                  | -2.14                               |
| *NO+H <sup>+</sup> +e <sup>-</sup> $\rightarrow$ *NOH                            | -0.45                                  | -0.49                               |
| *NOH+H <sup>+</sup> +e <sup>-</sup> $\rightarrow$ *N+H <sub>2</sub> O            | -1.40                                  | -1.66                               |
| *N+ H <sup>+</sup> +e <sup>-</sup> $\rightarrow$ *NH                             | -0.89                                  | -0.92                               |
| *NH+ H <sup>+</sup> +e <sup>-</sup> $\rightarrow$ *NH <sub>2</sub>               | 0.35                                   | 0.30                                |
| *NH <sub>2</sub> + H <sup>+</sup> +e <sup>-</sup> $\rightarrow$ *NH <sub>3</sub> | <b>0.66</b>                            | <b>0.56</b>                         |

**Table S8.** Computed Gibbs free energy of the optimal pathway for ammonia formation on the Ti<sub>2</sub>CBr<sub>2</sub> MXene without and with solvation effects. ( $\Delta G$ , units in eV)

| Ti <sub>2</sub> CBr <sub>2</sub>                                                 | $\Delta G$ (without solvation effects) | $\Delta G$ (with solvation effects) |
|----------------------------------------------------------------------------------|----------------------------------------|-------------------------------------|
| *+NO $\rightarrow$ *NO                                                           | -2.27                                  | -2.29                               |
| *NO+H <sup>+</sup> +e <sup>-</sup> $\rightarrow$ *NOH                            | -0.42                                  | -0.49                               |
| *NOH+H <sup>+</sup> +e <sup>-</sup> $\rightarrow$ *N+H <sub>2</sub> O            | -1.37                                  | -1.67                               |
| *N+ H <sup>+</sup> +e <sup>-</sup> $\rightarrow$ *NH                             | -0.89                                  | -0.89                               |
| *NH+ H <sup>+</sup> +e <sup>-</sup> $\rightarrow$ *NH <sub>2</sub>               | 0.42                                   | 0.39                                |
| *NH <sub>2</sub> + H <sup>+</sup> +e <sup>-</sup> $\rightarrow$ *NH <sub>3</sub> | <b>0.72</b>                            | <b>0.69</b>                         |

**Table S9.** Computed Gibbs free energy of the optimal pathway for ammonia formation on the Ti<sub>2</sub>CSe<sub>2</sub> MXene without and with solvation effects. ( $\Delta G$ , units in eV)

| Ti <sub>2</sub> CSe <sub>2</sub>                                                 | $\Delta G$ (without solvation effects) | $\Delta G$ (with solvation effects) |
|----------------------------------------------------------------------------------|----------------------------------------|-------------------------------------|
| *+NO $\rightarrow$ *NO                                                           | -1.75                                  | -1.53                               |
| *NO+H <sup>+</sup> +e <sup>-</sup> $\rightarrow$ *NOH                            | -0.59                                  | -0.64                               |
| *NOH+H <sup>+</sup> +e <sup>-</sup> $\rightarrow$ *N+H <sub>2</sub> O            | -1.45                                  | -1.73                               |
| *N+ H <sup>+</sup> +e <sup>-</sup> $\rightarrow$ *NH                             | -0.90                                  | -0.96                               |
| *NH+ H <sup>+</sup> +e <sup>-</sup> $\rightarrow$ *NH <sub>2</sub>               | 0.23                                   | 0.20                                |
| *NH <sub>2</sub> + H <sup>+</sup> +e <sup>-</sup> $\rightarrow$ *NH <sub>3</sub> | <b>0.44</b>                            | <b>0.39</b>                         |

**Table S10.** Computed Gibbs free energy of the optimal pathway for ammonia formation on the Ti<sub>2</sub>CTe<sub>2</sub> MXene without and with solvation effects. ( $\Delta G$ , units in eV)

| Ti <sub>2</sub> CTe <sub>2</sub>                                                 | $\Delta G$ (without solvation effects) | $\Delta G$ (with solvation effects) |
|----------------------------------------------------------------------------------|----------------------------------------|-------------------------------------|
| *+NO $\rightarrow$ *NO                                                           | -2.14                                  | -2.22                               |
| *NO+H <sup>+</sup> +e <sup>-</sup> $\rightarrow$ *NOH                            | -0.24                                  | -0.23                               |
| *NOH+H <sup>+</sup> +e <sup>-</sup> $\rightarrow$ *N+H <sub>2</sub> O            | -1.67                                  | -1.99                               |
| *N+ H <sup>+</sup> +e <sup>-</sup> $\rightarrow$ *NH                             | -0.66                                  | -0.68                               |
| *NH+ H <sup>+</sup> +e <sup>-</sup> $\rightarrow$ *NH <sub>2</sub>               | 0.62                                   | 0.61                                |
| *NH <sub>2</sub> + H <sup>+</sup> +e <sup>-</sup> $\rightarrow$ *NH <sub>3</sub> | <b>0.87</b>                            | <b>0.85</b>                         |

**Table S11.** Computed Gibbs free energy of the optimal pathway for ammonia formation on the  $\text{Ti}_2\text{C}(\text{NH})_2$  MXene without and with solvation effects. ( $\Delta G$ , units in eV)

| $\text{Ti}_2\text{C}(\text{NH})_2$                                           | $\Delta G$ (without solvation effects) | $\Delta G$ (with solvation effects) |
|------------------------------------------------------------------------------|----------------------------------------|-------------------------------------|
| $*+\text{NO} \rightarrow *\text{NO}$                                         | -1.74                                  | -1.83                               |
| $*\text{NO}+\text{H}^++\text{e}^- \rightarrow *\text{NOH}$                   | -0.25                                  | -0.23                               |
| $*\text{NOH}+\text{H}^++\text{e}^- \rightarrow *\text{N}+\text{H}_2\text{O}$ | -1.27                                  | -1.61                               |
| $*\text{N}+\text{H}^++\text{e}^- \rightarrow *\text{NH}$                     | -0.91                                  | -0.83                               |
| $*\text{NH}+\text{H}^++\text{e}^- \rightarrow *\text{NH}_2$                  | -0.19                                  | -0.20                               |
| $*\text{NH}_2+\text{H}^++\text{e}^- \rightarrow *\text{NH}_3$                | <b>0.19</b>                            | <b>0.16</b>                         |

**Table S12.** Computed Gibbs free energy of the optimal pathway for ammonia formation on the  $\text{Ti}_2\text{C}(\text{OH})_2$  MXene without and with solvation effects. ( $\Delta G$ , units in eV)

| $\text{Ti}_2\text{C}(\text{OH})_2$                                                  | $\Delta G$ (without solvation effects) | $\Delta G$ (with solvation effects) |
|-------------------------------------------------------------------------------------|----------------------------------------|-------------------------------------|
| $*+\text{NO} \rightarrow *\text{NO}$                                                | -3.70                                  | -3.95                               |
| $*\text{NO}+\text{H}^++\text{e}^- \rightarrow *\text{HNO}$                          | 0.27                                   | 0.40                                |
| $*\text{HNO}+\text{H}^++\text{e}^- \rightarrow *\text{NH}-\text{H}_2\text{O}$       | -2.71                                  | -2.67                               |
| $*\text{NH}-\text{H}_2\text{O} \rightarrow *\text{NH}+\text{H}_2\text{O}(\text{g})$ | 0.33                                   | -0.004                              |
| $*\text{NH}+\text{H}^++\text{e}^- \rightarrow *\text{NH}_2$                         | 0.50                                   | 0.57                                |

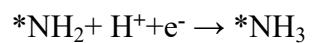**1.14****1.20**

**Table S13.** Bader charge variation of three “active” Ti atoms upon NO adsorption

| <b>MXenes</b>                      | <b>charge transfer (e<sup>-</sup>)</b> |
|------------------------------------|----------------------------------------|
| bare Ti <sub>2</sub> C             | 0.911                                  |
| Ti <sub>2</sub> CS <sub>2</sub>    | 0.102                                  |
| Ti <sub>2</sub> CO <sub>2</sub>    | 0.480                                  |
| Ti <sub>2</sub> CF <sub>2</sub>    | 0.490                                  |
| Ti <sub>2</sub> CCl <sub>2</sub>   | 0.280                                  |
| Ti <sub>2</sub> CBr <sub>2</sub>   | 0.309                                  |
| Ti <sub>2</sub> CSe <sub>2</sub>   | 0.208                                  |
| Ti <sub>2</sub> CTe <sub>2</sub>   | 0.311                                  |
| Ti <sub>2</sub> C(NH) <sub>2</sub> | 0.205                                  |
| Ti <sub>2</sub> C(OH) <sub>2</sub> | 0.541                                  |
